# Supplementary material for: A SARS-CoV-2 related signature that explores the tumor microenvironment and predicts immunotherapy response in esophageal squamous cell cancer
Source: Aging (Albany NY). 2023 Oct 6;15(19):10501–23. doi: 10.18632/aging.205090 (PMC10599722; doi:10.18632/aging.205090)
Supplement: Supplementary Figures [file aging-15-205090-s001.pdf]

## SUPPLEMENTARY FIGURES

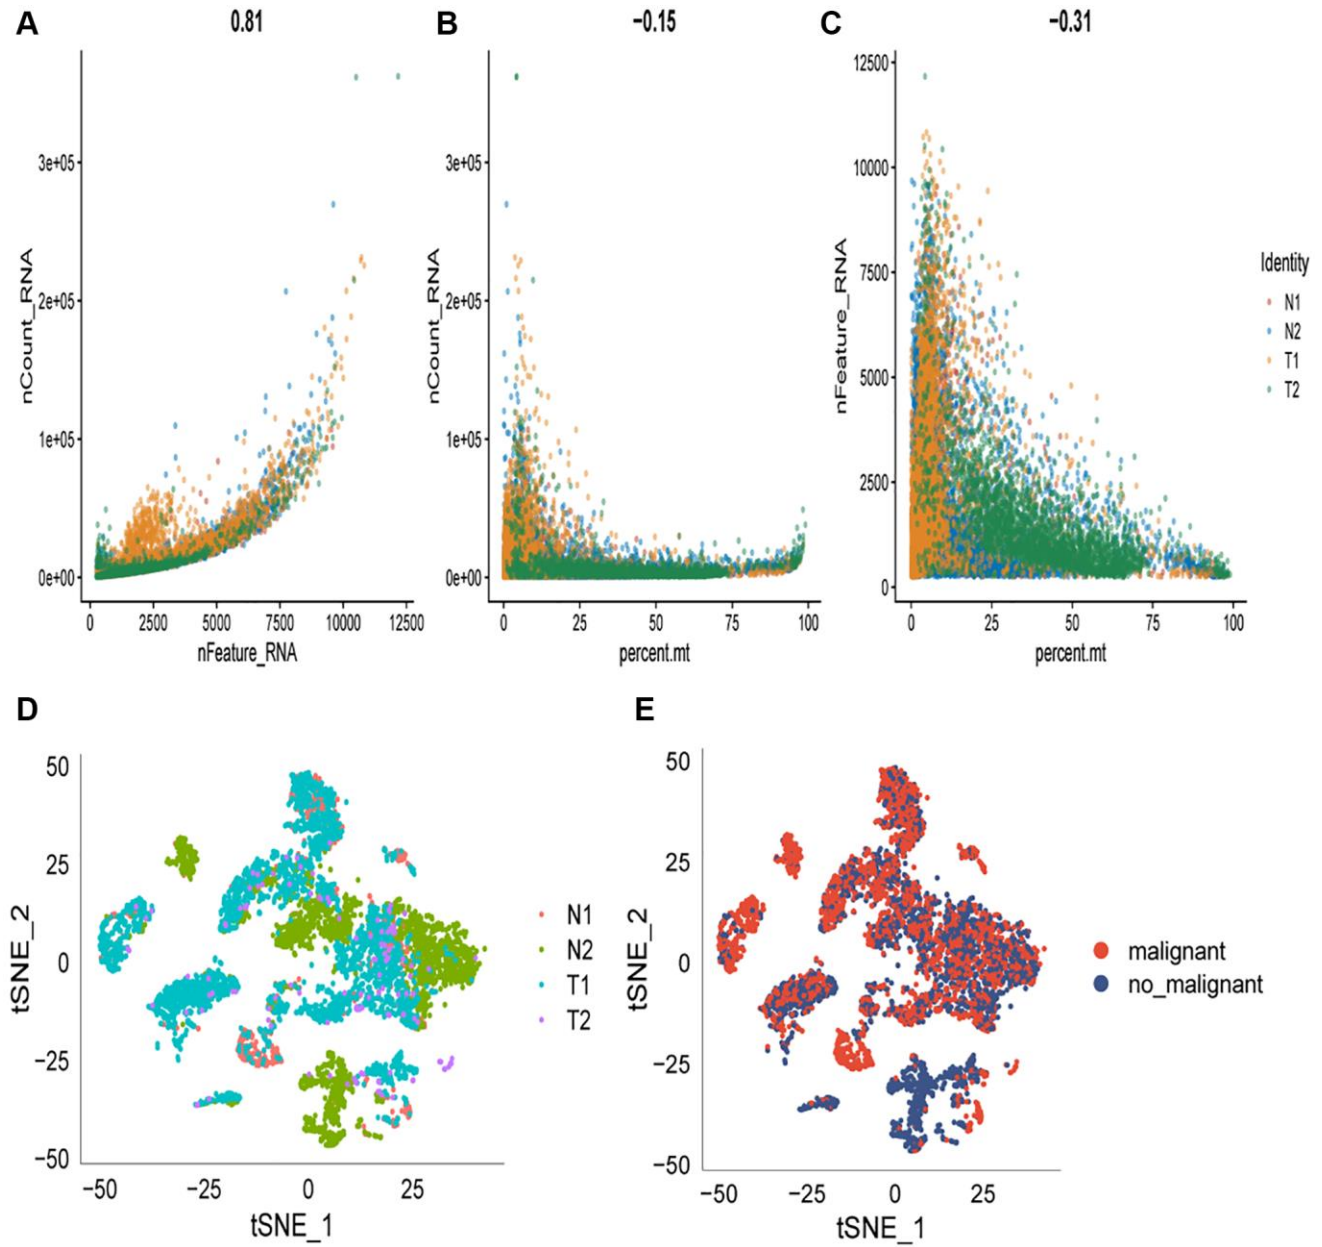

**Supplementary Figure 1. The details of re-process of scRNA-seq data of ESCC.** (A–C) The relationship between the amount of mRNA/UMI and mitochondrial genes, the relationship between the amount of mRNA and UMI. (D) tSNE distribution of different samples. (E) tSNE distribution of malignant and non-malignant samples.

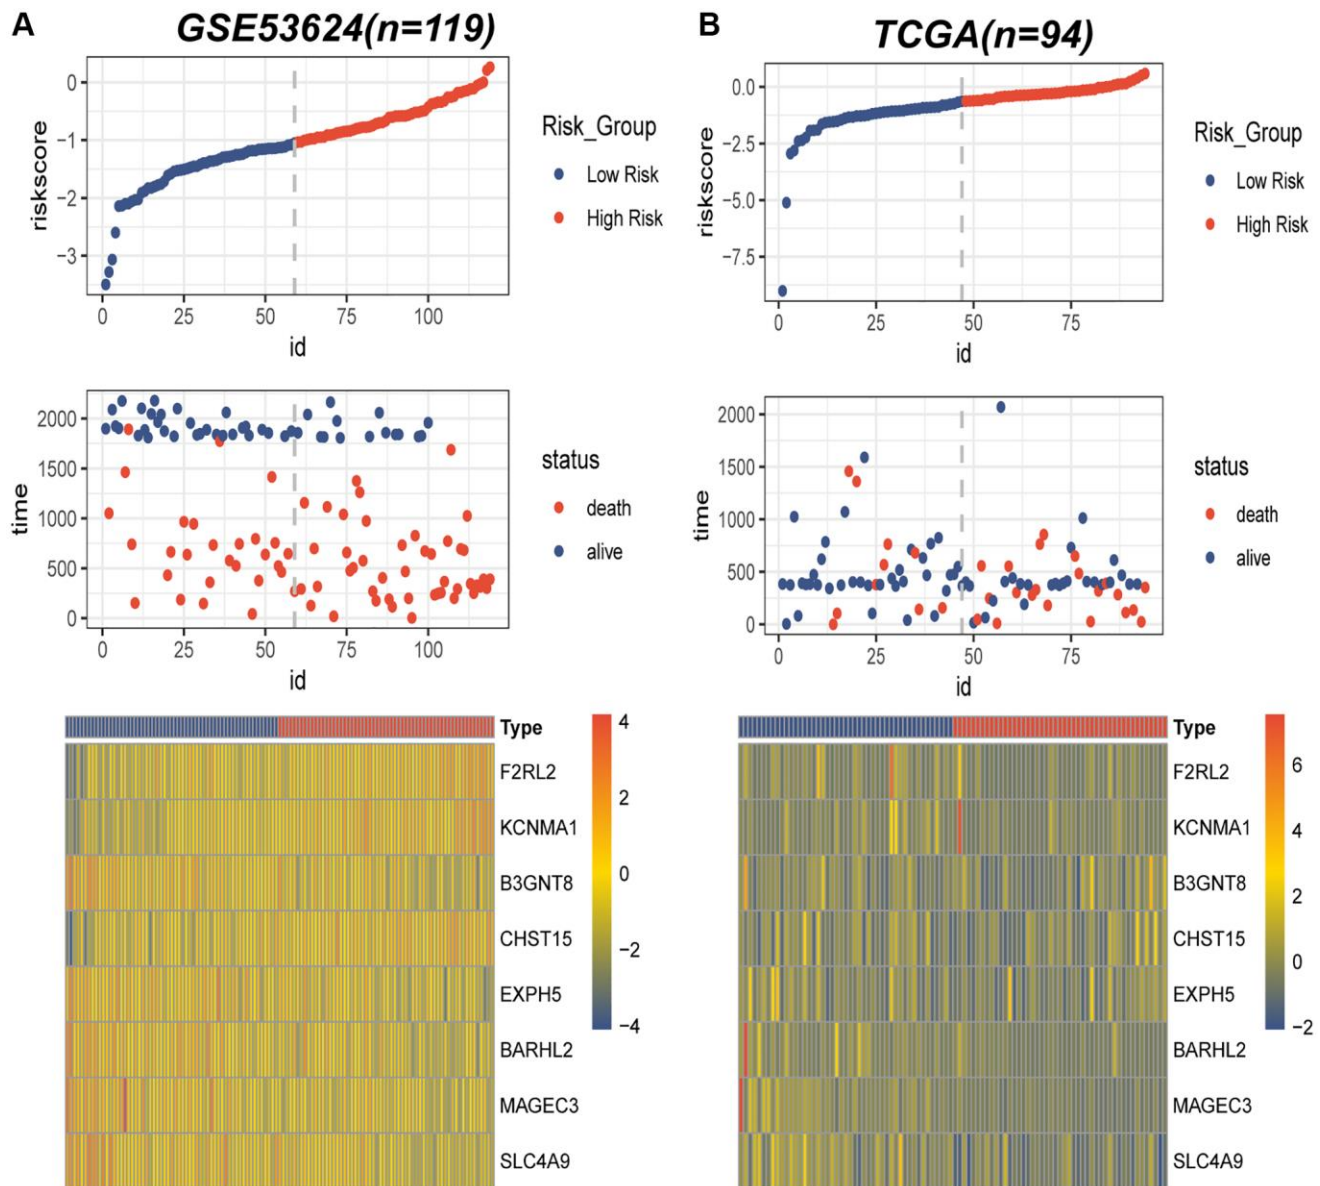

**Supplementary Figure 2. Correlations between risk score and prognosis of ESCC patients.** (A) Patient risk score distribution, scatter diagram of patient survival status, and expression pattern of prognostic genes in training cohort (GSE53624). (B) Patient risk score distribution, scatter diagram of patient survival status, and expression pattern of prognostic genes in test cohort (TCGA).

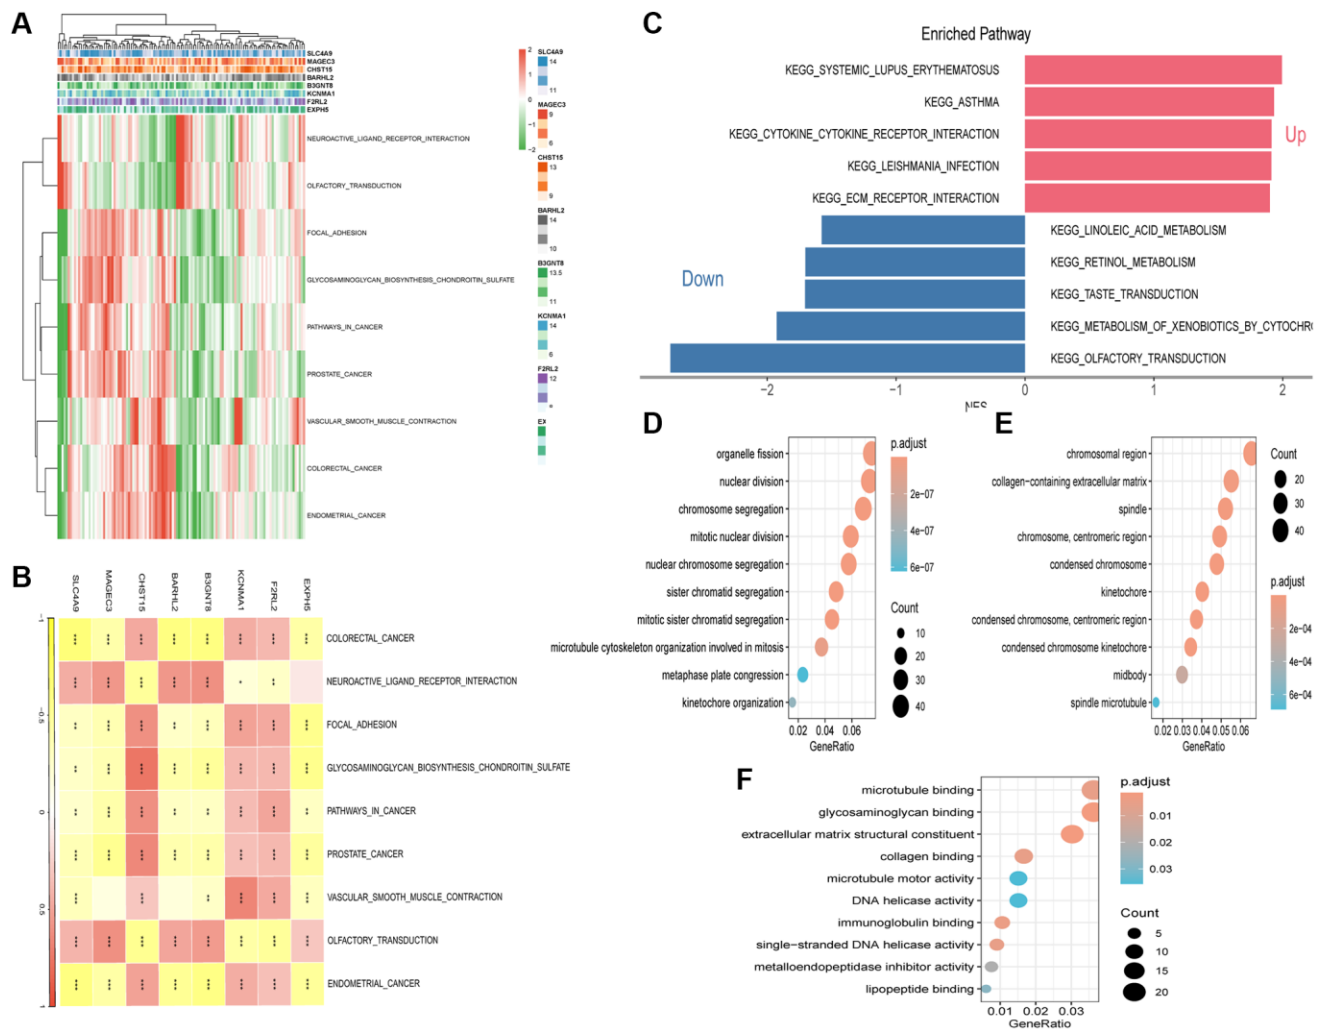

**Supplementary Figure 3. Gene Set Enrichment Analysis (GSEA).** (A) Heatmap exhibiting enrichment score for key pathways based on the hub genes. (B) Gene-pathway correlation heatmap. (C) Gene Set Enrichment Analysis of up-regulated and down-regulated genes (D) GO-BP analysis (E) GO-CC analysis (F) GO-MF analysis.
